# Supplementary material for: Quantifying the contribution of land use change to surface temperature in the lower reaches of Yangtze River
Source: Copernicus journal article supplement (doi:10.5194/acp-2016-1013), 2016-11-21
Supplement: Supplementary file [file acp-2016-1013-AC1-supplement.pdf]

# Quantifying the contribution of land use change to surface temperature in the lower reaches of Yangtze River

Xueqian Wang<sup>1,2</sup>, Weidong Guo<sup>1,2,\*</sup>, Bo Qiu<sup>1,2</sup>, Ye Liu<sup>1,2</sup>, Jianning Sun<sup>1,2</sup>, Aijun Ding<sup>1,2</sup>

<sup>1</sup>[CMA-NJU Joint Laboratory for Climate Prediction Studies](#), Institute for Climate and Global Change Research, School of Atmospheric Sciences, Nanjing University, Nanjing, China.

<sup>2</sup>Joint International Research Laboratory of Atmospheric and Earth System Sciences, Nanjing, China.

\*[CMA-NJU Joint Laboratory for Climate Prediction Studies, Institute for Climate and Global Change Research, School of Atmospheric Sciences, Nanjing University, Nanjing, China.](#)

Correspondence to: Weidong Guo (guowd@nju.edu.cn)

## Abstract

Anthropogenic land use has significant impact on climate change. Located in the typical East Asian monsoon region, the land-atmosphere interaction in the lower reaches of Yangtze River is even more complicated due to intensive human activities and different types of land use in this region. To better understand these effects on microclimate change, we compare differences in land surface temperature ( $T_s$ ) for three land types around Nanjing from March to August, 2013, and then quantify the contribution of land surface ~~parameterfactor~~ to these differences ( $\Delta T_s$ ) by considering the effects of surface albedo, roughness length, and evaporation respectively. The atmospheric background contribution to  $\Delta T_s$  is also considered based on differences in air temperature ( $\Delta T_a$ ). It is found that the cropland cooling effect decreases  $T_s$  by  $-1.76^\circ\text{C}$  and urban heat island effect increases  $T_s$  by  $1.25^\circ\text{C}$ . They have opposite impacts but are both significant in this region. ~~are induced by significant human activities in this region but they have opposite impacts on  $T_s$ .~~ Various changes in surface ~~parameterfactor~~ affect radiation and energy distribution and eventually modify  ~~$T_s$~~  $T_s$ . It is the evaporative cooling effect that plays the most important role in this region and accounts for  $-1.40^\circ\text{C}$  of the crop cooling and  $2.29^\circ\text{C}$  of the urban warming. Besides, the background atmospheric circulation is also an indispensable part in land-atmosphere feedback induced by land use change and reinforces both these two ~~cropland cooling and urban heat island~~ effects.

# 1 **1 Introduction**

2 Land use/Land cover change (LULCC) has been widely investigated in the past few decades, and it has  
3 been found that more than half of the land surface on Earth has been exploited by human (Baldocchi,  
4 2014). Robust evidences indicate that the impact of LULCC on temperature is obvious and this impact  
5 depends on different types of land surface transform. Deforestation usually has a warming effect at lower  
6 latitudes and a cooling effect at mid- to high latitudes (Lee et al., 2011). Global deforestation may result in  
7 cooling (Pitman et al., 2009;Davin and Noblet-Ducoudré 2010;Betts et al., 2007) and amplify diurnal  
8 temperature variance (Alkama and Cescatti, 2016). The urban heat island (UHI) is one of the most  
9 significant human-induced phenomena and it usually results in apparent warming in urban area compared  
10 to the surrounding rural areas. The UHI effect depends on latitude, climate regime, urban area size, and  
11 time of the season (Kalnay and Cai, 2003;McCarthy et al., 2010;Zhao et al., 2014;Basara et al., 2008;Lin  
12 et al., 2016). Agriculture often leads to cooling temperature in different patterns, and the cooling effect  
13 can usually be magnified when it comes to irrigation (Campra et al., 2008;Kueppers et al., 2007;Lobell et  
14 al., 2006;Zhang et al., 2011). Thereby analyzing different types of land use plays an important role not  
15 only in evaluating the climate change on different spatial scale (Alkama and Cescatti, 2016;Baldocchi  
16 and Ma, 2013;Huang et al., 2008;Wang et al., 2010;Hari et al., 2015), but also in improving the predictive  
17 capacity of models (Huang et al., 2015;Niu et al., 2011;Zhang et al., 2015). Although there have been  
18 many studies concentrating on LULCC, they rarely compare the differences in the mechanisms behind  
19 the land-atmosphere interaction with different types of land use.

20 The effects of anthropogenic land use on local climate are complicated with a series of stabilizing and  
21 reinforcing feedbacks (Baldocchi, 2014). Although the surface albedo change has been widely analyzed  
22 as the strongest climate forcing (Campra et al., 2008), IPCC (2013) emphasizes that it is not the only  
23 effect of LULCC because LULCC also causes other changes that don't affect the radiative process but can  
24 also significantly influence the surface temperature ( $T_s$ ). These changes such as surface roughness  
25 (Davin and Noblet-Ducoudré 2010;Kanda, 2007) and evapotranspiration changes (Pitman et al., 2009)  
26 are more uncertain and difficult to quantify, whereas they exert essential influences on the radiative  
27 process and energy redistribution on the land surface (Baldocchi and Ma, 2013;Campra et al., 2008;Yang

1 | et al., 2014), and thereby cause obvious differences in  $T_s T_s$  over various land surface types under  
2 | different climate backgrounds (Biggs et al., 2008; Luysaert et al., 2014).

3 | To understand the influence of LULCC, it is important to quantify the contributions of different surface  
4 | parameter factors for each type of land use. Juang (2007) proposed the method to decompose the observed  
5 | change in  $T_s T_s$  based on surface energy balance, and this method was refined later by Luysaert et al.  
6 | (2014). Lee et al. (2011) presented a new metric and attributed the change in  $T_s T_s$  to radiation, convection  
7 | and evaporation. Chen and Dirmeyer (2016) added the atmospheric background effect to the metric  
8 | proposed by Lee et al.. This method can be used to calculate each factor's contribution to  $T_s T_s$  in areas  
9 | with different vegetation cover (Bright et al., 2014; Li et al., 2015) as well as urban area (Zhao et al.,  
10 | 2014).

11 | The lower reaches of Yangtze River Valley, which is located in the typical East Asian monsoon region, is  
12 | one of the regions with the most intensive human activities around the world. Rapid urbanization,  
13 | industrialization, expansion of farmland, animal husbandry, deforestation and afforestation are common  
14 | features in this region. In monsoon region, LULCC affects climate not only by influencing local  
15 | convection through radiation and surface heat fluxes, but also by influencing the monsoon onset and  
16 | weakening—and related precipitation (Hsu and Liu, 2003; Xue et al., 2004). However, both flux  
17 | observations and characteristic analyses are very limited in the lower reaches of Yangtze River Valley, let  
18 | alone quantitative analysis (Gao, 2003; Bi et al., 2007). In this study, the contributions of different surface  
19 | land parameter factors to surface temperature are calculated based on analysis of data collected at several  
20 | sites, where the land use type includes crop, grass and urban area respectively (Guo et al., 2016). We first  
21 | quantitatively compare the influences of several different surface parameter factors on  $T_s T_s$  over different  
22 | types of managed land, and then demonstrate that the Bowen ratio effect dominates the feedback of land  
23 | use change to surface temperature in this region, while other factors play a secondary role.

## 1 2. Data and methods

### 2 2.1 Observation Sites and data

3 The measurements used in this study were collected at three sites in the lower reaches of Yangtze River.  
4 The urban site, where the average building height is 19.7m, is located at Dangxiao, the central urban area  
5 of Nanjing (32°2'24"N, 118°47'24"E). The other two sites are both located at around  
6 (31°43'08"N, 118°58'51"E) in Lishui county and classified as a grassland site and a cropland site,  
7 respectively. The grass height is about 60cm. Rice grows in the summer (mid June to early November)  
8 and wheat grows in the winter (from mid- to late November to early June of next year) nearby the  
9 cropland site, with the largest plant height of 75cm.

10 In this study, sensible and latent heat fluxes are measured at 30-min intervals by the eddy covariance  
11 system (EC3000, Campbell) deployed at 3 m height over the grass site and crop site, and at 36.5 m height  
12 above the 22 m high building at the urban site. The sampling frequency is 10Hz for measurements by the  
13 Data acquisition (CR5000). ~~We have applied s~~Strict corrections such as coordinate rotation  
14 correction(Wilczak et al., 2001), frequency response correction(Moore, 1986), WPL correction(Webb et  
15 al., 1980)~~(Moore, 1986),~~ and quality control~~have been applied to all the flux measurements~~ (Foken et  
16 al., 2004) to all the flux measurements. ~~-~~The measurements contain micro-meteorological elements of air  
17 temperature (HMP45C-L, Vaisala), precipitation (TE525MM-L, Texas Electronics), and surface  
18 radiation fluxes including downward and upward short-wave (CM21, Kipp & Zonen) and long-wave  
19 (CG4, Kipp & Zonen) fluxes at half-hour intervals. Additional information about both the~~these~~  
20 observations and sites such as the location and spatial distribution of sites can be found in the previous  
21 studies (Guo et al., 2016).

22 The analysis focuses on March to August in 2013. This is because the eddy covariance method is assumed  
23 to work well only when turbulence can fully develop. To quantify the different contributions to  $\Delta T_s T_s$   
24 more accurately, we use Integrated Turbulence Characteristics (ITC) proposed by Foken (Foken and  
25 Wichura, 1996) to remove the data with low quality~~select data for general use (ITC<100%)~~. Such  
26 standard was also adopted by FLUXNET program (Foken et al., 2004).

## 1 2.2 Methodology

2 In an ideal state, the surface energy balance can be expressed as:

$$3 R_n + AH = H + LE + G \quad (1)$$

4 Where  $R_n$  is the net radiation calculated from  $R_n = DSR + DLR - USR - ULR$ , DSR, DLR, USR and  
5 ULR are the [daily](#) -downward shortwave radiation, downward longwave radiation, upward shortwave  
6 radiation and upward longwave radiation, respectively. Anthropogenic heat (AH) flux is more obvious in  
7 urban areas than in rural areas but it is difficult to accurately measure. H and LE are the [daily average](#)  
8 sensible and latent heat flux. G includes the heat flux at the surface of soil or buildings and the thermal  
9 storage in the canopy and it's relatively small. In this paper, we only discuss the differences between  $R_n$ ,  
10 LE and H on the basis of the observations at the urban area of Nanjing and the countryside.

11 Following the method proposed by Lee [et al.](#) (2011) and refined by Chen and Dirmeyer (2016), the  
12 biophysical mechanism can be expressed as a temperature change and decomposed into three direct  
13 factors, i.e. radiation balance, aerodynamic resistance and evaporation, and one indirect factor of air  
14 temperature on larger scale. Therefore, ignoring AH and G in urban area, [the daily surface temperature](#)  
15 [change](#) can be approximated by:

$$16 \Delta T_s \approx \frac{\lambda_0}{1+f} \Delta S + \frac{-\lambda_0}{(1+f)^2} R_n^* \Delta f_1 + \frac{-\lambda_0}{(1+f)^2} R_n^* \Delta f_2 + \Delta T_a \quad (2)$$

17 with

$$18 f = \frac{\lambda_0 \rho C_p}{r_a} \left(1 + \frac{1}{\beta}\right)$$
$$\Delta f_1 = \frac{-\lambda_0 \rho C_p}{r_a} \left(1 + \frac{1}{\beta}\right) \frac{\Delta r_a}{r_a}$$
$$\Delta f_2 = \frac{-\lambda_0 \rho C_p}{r_a} \frac{\Delta \beta}{\beta^2}$$

19 [Where](#)  $\Delta T_s$  is the difference in the surface temperature between other managed sites and natural  
20 grass site,  $\lambda_0 = 1/4\varepsilon\sigma T^3$  is the local climate sensitivity,  $f$  is the energy redistribution factor,  
21  $S = DSR - USR$  is net shortwave radiation, [Δ S is the difference between managed site and grass site.](#)

1  $R_n^* = (1 - \alpha)DSR + DLR - (1 - \varepsilon)DLR - \varepsilon\sigma T_a^4$  is the apparent parent net radiation,  $\alpha = \underline{USR / DSR}$   
 2  $\alpha = \underline{USR / DSR}$  is ~~the~~ albedo,  $\varepsilon$  is the surface emissivity,  $\sigma$  is the Stefan-Boltzmann constant. DSR and  
 3 USR are the daily averages of these solar radiations at half-hour intervals during the period from 06:00  
 4 to 18:00 LST.  $T_a$  is the air temperature at reference height ~~and  $\Delta T_a$  is the difference between managed~~  
 5 ~~sites and grass site.~~

6 We regard the grass site, with local native vegetation, as the base site. The terms on the right-hand side of  
 7 Eq. (2) shows that the contributions to  $\Delta T_s$  are from radiation change (term 1), aerodynamic resistance  
 8 change (term 2) related to aerodynamic resistance ( $r_a$ ) which represents the surface roughness effect, and  
 9 evaporation change (term 3) related to Bowen ratio ( $\beta = H / LE$ ). Term 2 and term 3 are the two  
 10 components associated with the energy redistribution.

11 ~~—To avoid the adverse influence of some extreme values at half-hour interval on the calculated  $\Delta T_s$ —~~  
 12 ~~Therefore, daily averages of these factors all the independent are used to parameters of the land use type~~  
 13 ~~calculate their and the respective contribution of them to  $T_s$ .~~ can be calculated.

14 In the sites covered by vegetation, the aerodynamic resistance can be expressed as (Verhoef and De Bruin,  
 15 1997):

$$16 \quad r_a = \frac{1}{\kappa u_*} \left[ \ln \frac{z_m - d}{z_{0m}} + \ln \frac{z_m}{z_{0h}} - \Psi_h(\zeta) \right] \quad (3)$$

17 Where  $Z_{0m}$  is the aerodynamic roughness length, which can be given by the independent method (Chen  
 18 et al., 1993);  $\Psi_h(\zeta)$  is the stability correction function for temperature; and  $\ln \frac{z_{0m}}{z_{0h}} = 0.13 \left( \frac{z_{0m} u_*}{\nu} \right)^{0.45}$   
 19 (Zeng and Dickinson, 1998), where  $\nu$  is the viscosity coefficient with a value of  $1.46 \times 10^{-5} \text{m}^2 \text{s}^{-1}$ . But  
 20 in urban area, because the wind profile is not applicable well, we calculate the aerodynamic resistance  
 21 from:

$$22 \quad r_a = \frac{\rho C_p (T_s - T_a)}{H} \quad (4)$$

### 1 3. Results

#### 2 3.1 Differences in surface temperature

3 Due to the East Asian monsoon anomaly and decreased moisture convergent, 2013 is an extremely  
4 drought year in southern China, where the summer precipitation decreased by more than 78% of the  
5 average amount and broke the historical record over the past 50 years (Yuan et al., 2016). The drought in  
6 2013 was especially severe in the mid- to lower reaches of Yangtze River. Under the same dry condition,  
7 different land use types cause different feedbacks to surface temperature ( $T_sT_s$ ) and other surface  
8 characteristics. To compare the influence of different land use type on microclimate, the surface  
9 temperature change ( $\Delta T_s$ ) from grassland to cropland and to urban area are quantified.

10 Monthly variations of  $T_sT_s$  differences ( $\Delta T_s$ ) between crop and grass sites and between urban and grass  
11 sites are presented in Figure 1. During the entire growing season, cropland had an obvious cooling effect,  
12 which was strengthened when it came to irrigation (Kueppers et al., 2007; Lobell et al., 2006). The  
13 extremely large differences between crop and grass sites were  $-1.75^\circ\text{C}$  in April and  $-2.46^\circ\text{C}$  in August  
14 (Figure 1) with less precipitation in these months (Guo et al., 2016). However, the cooling effect of only  
15  $-0.34^\circ\text{C}$  in June was relatively small because wheat harvest and straw burning increased  $T_sT_s$  in the  
16 cropland site. On the contrary, the urban heat island (UHI) effect resulted in at least  $1^\circ\text{C}$  higher  
17 temperature at the urban site than at the rural sites in each month of the growing season. The extremely  
18 warm and dry condition in April and July was more evident in urban area than at the grassland site (Guo  
19 et al., 2016), with the maximum value of  $1.95^\circ\text{C}$  higher temperature in April and  $2.17^\circ\text{C}$  in July.  
20 Comparing different land types, it is clear that land use influences the local  $T_sT_s$  to a large extent and  
21 makes it more complicated. Cropland cooling and UHI effects are both obvious in East Asian monsoon  
22 region.

#### 23 3.2 Variations and differences in land surface factors

24 The characteristics of physical processes at different surface types can be represented by surface  
25 ~~parameterfactor~~s, including albedo, Bowen ratio, surface roughness and aerodynamic resistance. These  
26 ~~parameterfactor~~s reflect the momentum, heat and moisture exchanges between land and atmosphere  
27 (Baldocchi and Ma, 2013; Bright et al., 2015; IPCC, 2013). ~~To figure out the general variation during the~~

1 ~~whole growing season.~~ ~~Ff~~Figure 2 shows the monthly variation and differences of these  
2 ~~parameter factors by averaging their daily values~~ across the crop, urban and grass sites. ~~Error bar is given~~  
3 ~~as 1 s.d. for the monthly averages of daily  $T_s$ .~~ ~~Different land types with different surface color,~~  
4 ~~permeable rate, heat content and surface roughness have different properties and functions in the~~  
5 ~~land-atmosphere interactions. Human modifications in the urban area make it more obviously different~~  
6 ~~from grassland and cropland.~~ Except for the extremely low albedo in cropland from May to June, the  
7 differences in albedo, Bowen ratio and surface roughness between crop site and grass site are opposite to  
8 the differences between urban site and grass site.

9 Monthly variation of surface albedo shows that the albedo in grassland gradually decreased from March  
10 to June but slightly increased in July and August because of the drought. Due to a series of agricultural  
11 activities including wheat harvest, straw burning and rice irrigation from early May to mid June, the  
12 albedo at cropland decreased quickly and ~~reached the minimum value in June due to the burning, and~~  
13 then increased when rice started growing. Thereby the difference in albedo ( $\Delta\alpha$ ) between the crop and  
14 grass site was negative from May to July, with the extreme value of -0.06 in June. Monthly  $\Delta\alpha$  between  
15 urban and grass site remained negative during the whole growing season (Figure 2b). ~~Bowen ratio is~~As a  
16 measurement of dry and wet condition of the surface to a certain degree. ~~Sufficient soil water content~~  
17 ~~benefit for the energy exchange in the way of higher LE and lower Bowen ratio.~~ ~~Bowen ratio decreases~~  
18 ~~when there is sufficient soil water content.~~ The largest differences occurred in March, with a value of 2.8  
19 at the urban site and -1.24 at the crop site. With the lack of precipitation in August, the increase in  $\beta$   
20 obviously occurred at the grassland site but not at the other two managed land sites (Figure 2c). The  
21 Bowen ratio at the crop site was always low in the growing season because of sufficient water supply.  
22 Besides, Figure 2e and 2f present that the urban surface roughness ( $Z_{0m}$ ) is much higher than that at the  
23 lands with vegetation cover. The average surface roughness length at the urban area is 2.82m higher than  
24 at the suburban area. When it comes to the sites with vegetation cover, it is shown that  $Z_{0m}$  at the grassland  
25 site was a little higher than that at the cropland site and the extreme difference was -0.05m in June due to  
26 the wheat harvest. Contrary to the differences in  $Z_{0m}$ , the aerodynamic resistance at the urban site was  
27 obviously lower than that at other sites during the entire growing season. The grass site and crop site had  
28 a similar trend of aerodynamic resistance in the spring but a relatively large difference in the summer.



1 Different to the  $Z_{0m}$  variation, the aerodynamic resistance in grassland was much higher than that in urban  
2 area but a little lower than that in cropland. The largest differences in aerodynamic resistance between  
3 ~~grassland and~~ urban area and grassland and that between ~~grassland and~~ cropland and grassland both  
4 occurred in August with values of -44.36 s/m and 29.08 s/m respectively.

### 5 **3.3 Attribution of the differences in micrometeorological elements**

6 In the land-atmosphere interaction process under the same climate background, different types of land use  
7 with different surface parameterfactors can affect the radiation budget and redistribution of surface  
8 sensible and latent heat flux, and eventually affect local surface temperature. Figure 3 shows the  
9 attribution of  $\Delta T_s T_s$  to both direct surface parameterfactors and indirect atmospheric effect at the crop and  
10 urban sites. The  $\Delta T_s T_s$  attributed to roughness was calculated by aerodynamic resistance. Thus negative  
11 value means high roughness and cooling effect. It is clear that the dominant modification was caused by  
12 the evaporation represented by Bowen ratio, the value of which was even comparable to the observed  
13  $\Delta T_s T_s$  in the lower reaches of Yangtze River. While the  $\Delta T_s T_s$  driven by surface roughness and  
14 evaporation were of opposite sign at the crop site and the urban site, contributions of the two  
15 parameterfactors are both strengthened from the spring to summer. Even though the low vegetation height  
16 with low  $Z_{0m}$  at the crop site was favorable for higher  $\Delta T_s T_s$ , evaporation based on sufficient water supply  
17 reduced the Bowen ratio and cooled  $T_s T_s$  efficiently in the summer.

18 Averages of observed  $\Delta T_s T_s$  in the growing season were  $-1.79^\circ\text{C}$  at the crop site and  $2.01^\circ\text{C}$  at the urban  
19 site. At the crop site, the calculated  $\Delta T_s T_s$  was  $-1.76^\circ\text{C}$ , albedo and aerodynamic resistance contributions  
20 were  $0.09^\circ\text{C}$  and  $0.47^\circ\text{C}$ , respectively, but Bowen ratio cooling effect decreased  $\Delta T_s T_s$  by  $-1.40^\circ\text{C}$ . At the  
21 urban site, the calculated  $\Delta T_s T_s$  was  $1.25^\circ\text{C}$  and the difference between the observed and calculated  
22 values, which was larger in the summer, was partly derived from the ignorance of heat storage and  
23 anthropogenic heating. Even if radiation and surface roughness cooling existed, the limited evaporation  
24 reduced the partitioning of  $R_n$  to latent turbulent heat flux and warmed the urban area by  $2.29^\circ\text{C}$ .

25 Atmospheric feedback is also important. It not only can change the cloud distribution due to water and  
26 heat differences or aerosol effects and impact solar radiation (Yang et al., 2012; Betts et al., 2007; Biggs et  
27 al., 2008), but also can affect circulations or the variation of vegetation physical properties such as albedo

1 and evaporation (Niu et al., 2011; Yang et al., 2014) and subsequently affect  $T_s T_s$ . The atmospheric  
2 background effects of  $T_a$  were relatively stable and could not be neglected during the whole growing  
3 season. It had an average contribution of  $-0.93^\circ\text{C}$  to the cropland cooling effect and  $0.54^\circ\text{C}$  to the urban  
4 heat island effect respectively and enlarged the difference in surface temperature induced by land use.

#### 5 4 Conclusions and Discussions

6 Our study presented the first-handed observational evidences to verify the model results. Located in East  
7 Asian monsoon region, the lower reaches of Yangtze River has experienced the most intensive land use  
8 changes around the world, which has significant impacts on the local and regional climate. However,  
9 these impacts may not be easy to quantify due to the lack of observations in this region and uncertainties  
10 in modelling results. We used in-situ data to quantify the contributions of two main land use types here,  
11 the irrigated cropland and the rapid urbanization, to the microclimate change. It shows that the crop  
12 cooling and UHI were both obvious. The differences in  $T_s T_s$  were larger in the months with low  
13 precipitation and the monthly maximum values at both sites are even larger than  $2^\circ\text{C}$ .

14 For the study of LULCC effects on regional climate, more attention should be paid to nonradiative forces  
15 and the feedbacks from the background circulation. Although the surface albedo change caused by  
16 LULCC has been considered to be the strongest climate forcing and its effect has been widely and  
17 quantitatively estimated, other non-radiative modifications induced by LULCC including the roughness  
18 and evaporation are also important. Our results shows that the alteration of radiation, aerodynamic  
19 resistance, evaporation and air temperature all contributed to  $\Delta T_s T_s$  (Figure 3). The contributions of  
20 aerodynamic roughness and Bowen ratio, which are related to energy redistribution, are largely more  
21 than that of the net solar radiation. Despite the negative contributions of net solar radiation and  
22 aerodynamic resistance, the positive contribution of Bowen ratio controlled both the cropland cooling  
23 effect and urban heat island effect which have been enlarged by the influence of background atmospheric  
24 circulation.

25 These results clearly demonstrate that evaporative cooling effect is the most important factor that  
26 modifies the surface temperature change in the lower reaches of Yangtze River valley, and the  
27 temperature change induced by this effect is even comparative to the total value of  $\Delta T_s T_s$ . There has been

1 ~~some~~Recent studies ~~based on the field data of North America and western Europe (Chen and Dirmeyer,~~  
2 ~~2016;Zhao et al., 2014)~~ They indicate that ~~the effects of evaporation and convection~~surface roughness  
3 usually ~~dominates~~ ~~dominates~~ the land-atmosphere feedback of deforestation and urbanization in ~~the~~  
4 ~~mid-lower latitudes (Chen and Dirmeyer, 2016;Zhao et al., 2014)~~North America. ~~But in higher latitudes,~~  
5 ~~the radiative forcing contributes more to the surface temperature change associated with the~~  
6 ~~deforestation of Boreal region in North America (Lee et al. 2011) and Norway (Bright et al., 2014).~~  
7 Although the evaporative cooling and surface roughness both are important in land-atmosphere  
8 interaction, even more than albedo changes in some regions ~~at lower latitudes~~, their effects usually cannot  
9 be revealed accurately by models (IPCC, 2013) and the studies of these surface ~~parameter~~factor effects  
10 are still insufficient, especially in some regions with scarce in-situ observations such as in the lower  
11 reaches of Yangtze River. To better understand the local and regional climate change and the possible  
12 large scale feedback, for example the feedback between land use change and the East Asian monsoon  
13 system, more observational data and accurate modelling studies of the physical mechanisms between the  
14 land surface and the atmosphere are needed for further theoretical analysis.

## 15 **Acknowledgments**

16 This research is jointly sponsored by Natural Science Foundation of China (Grant No. 41475063,  
17 91544231), the National Science and Technology Support Program (2014BAC22B04). This work is also  
18 supported by the Jiangsu Collaborative Innovation Center for Climate Change. For data used in our study,  
19 please contact the corresponding author: Weidong Guo (guowd@nju.edu.cn).

## 20 **References**

- 21 Alkama, R., and Cescatti, A.: Biophysical climate impacts of recent changes in global forest cover, *Science*, 351, 600-604,  
22 2016.
- 23 Baldocchi, D., and Ma, S.: How will land use affect air temperature in the surface boundary layer? Lessons learned from a  
24 comparative study on the energy balance of an oak savanna and annual grassland in California, USA, *Tellus B*, 65,  
25 10.3402/tellusb.v65i0.19994, 2013.
- 26 Baldocchi, D.: Biogeochemistry: Managing land and climate, *Nature Climate Change*, 4, 330-331, 10.1038/nclimate2221,  
27 2014.
- 28 Basara, J. B., Hall, P. K., Schroeder, A. J., Illston, B. G., and Nemunaitis, K. L.: Diurnal cycle of the Oklahoma City urban heat  
29 island, *Journal of Geophysical Research*, 113, 10.1029/2008jd010311, 2008.

1 Betts, A. K., Desjardins, R. L., and Worth, D.: Impact of agriculture, forest and cloud feedback on the surface energy budget  
2 in BOREAS, *Agricultural & Forest Meteorology*, 142, 156-169, 2007.

3 Bi, X., Gao, Z., Deng, X., Wu, D., Liang, J., Zhang, H., Sparrow, M., Du, J., Li, F., and Tan, H.: Seasonal and diurnal variations in  
4 moisture, heat, and CO<sub>2</sub> fluxes over grassland in the tropical monsoon region of southern China, *Journal of Geophysical  
5 Research Atmospheres*, 112, 185-194, 2007.

6 Biggs, T. W., Scott, C. A., Anju, G., Jean - Philippe, V., Thomas, C., and Eungul, L.: Impacts of irrigation and anthropogenic  
7 aerosols on the water balance, heat fluxes, and surface temperature in a river basin, *Water Resources Research*, 44,  
8 181-198, 2008.

9 Bright, R. M., Anton-Fernandez, C., Astrup, R., Cherubini, F., Kvalevag, M., and Stromman, A. H.: Climate change implications  
10 of shifting forest management strategy in a boreal forest ecosystem of Norway, *Glob Chang Biol*, 20, 607-621,  
11 10.1111/gcb.12451, 2014.

12 Bright, R. M., Zhao, K., Jackson, R. B., and Cherubini, F.: Quantifying surface albedo and other direct biogeophysical climate  
13 forcings of forestry activities, *Glob Chang Biol*, 21, 3246-3266, 10.1111/gcb.12951, 2015.

14 Campra, P., Garcia, M., Canton, Y., and Palacios-Orueta, A.: Surface temperature cooling trends and negative radiative  
15 forcing due to land use change toward greenhouse farming in southeastern Spain, *Journal of Geophysical Research  
16 Atmospheres*, 113, 1044-1044, 2008.

17 Chen, J., Wang, J., and Mitsuta, Y.: An Independent Method to Determine the Surface Roughness Length, *Chinese Journal of  
18 Atmospheric Sciences*, 1993.

19 Chen, L., and Dirmeyer, P. A.: Adapting observationally based metrics of biogeophysical feedbacks from land cover/land use  
20 change to climate modeling, *Environmental Research Letters*, 11, 034002, 10.1088/1748-9326/11/3/034002, 2016.

21 Davin, E. L., and Noblet-Ducoudré, N. D.: Climatic Impact of Global-Scale Deforestation: Radiative versus Nonradiative  
22 Processes, *Journal of Climate*, 23, 97, 2010.

23 Foken, T., and Wichura, B.: Tools for quality assessment of surface-based flux measurements, *Agricultural & Forest  
24 Meteorology*, 78, 83-105, 1996.

25 Foken, T., Göckede, M., Mauder, M., Mahrt, L., Amiro, B., and Munger, W.: Post-Field Data Quality Control, 181-208 pp.,  
26 2004.

27 Gao, Z.: Measurements of turbulent transfer in the near-surface layer over a rice paddy in China, *Journal of Geophysical  
28 Research*, 108, 10.1029/2002jd002779, 2003.

29 Guo, W., Wang, X., Sun, J., Ding, A., and Zou, J.: Comparison of land-atmosphere interaction at different surface types in the  
30 mid- to lower Yangzi River Valley, *Atmospheric Chemistry & Physics*, 16, 9875-9890, 10.5194/acp-2016-49, 2016, 2016.

31 Hari, P., Petäjä, T., Bäck, J., Kerminen, V. M., Lappalainen, H. K., Vihma, T., Laurila, T., Viisanen, Y., Vesala, T., and Kulmala, M.:  
32 Conceptual design of a measurement network of the global change, *Atmospheric Chemistry & Physics*, 15, 21063-21093,  
33 2015.

34 Hsu, H. H., and Liu, X.: Relationship between the Tibetan Plateau heating and East Asian summer monsoon rainfall,  
35 *Geophysical Research Letters*, 30, 1182-1200, 2003.

36 Huang, J., Zhang, W., Zuo, J., Bi, J., Shi, J., Wang, X., Chang, Z., Huang, Z., Yang, S., Zhang, B., Wang, G., Feng, G., Yuan, J.,  
37 Zhang, L., Zuo, H., Wang, S., Fu, C., and Jifan, C.: An overview of the Semi-arid Climate and Environment Research  
38 Observatory over the Loess Plateau, *Advances in Atmospheric Sciences*, 25, 906-921, 10.1007/s00376-008-0906-7, 2008.

39 Huang, J., Yu, H., Guan, X., Wang, G., and Guo, R.: Accelerated dryland expansion under climate change, *Nature Climate  
40 Change*, 10.1038/nclimate2837, 2015.

41 IPCC: Climate Change 2013: The Physical Science Basis. Contribution of Working Group I to the Fifth Assessment Report of  
42 the Intergovernmental Panel on Climate Change, 1535 pp, Cambridge University Press, United Kingdom and New York, NY,  
43 USA,  
44 2013.

45 Juang, J.-Y., Katul, G., Siqueira, M., Stoy, P., and Novick, K.: Separating the effects of albedo from eco-physiological changes  
46 on surface temperature along a successional chronosequence in the southeastern United States, *Geophysical Research  
47 Letters*, 34, 10.1029/2007gl031296, 2007.

1 Kalnay, E., and Cai, M.: Impact of urbanization and land use on climate change, *Nature*, -1, 528-531, 2003.

2 Kanda, M.: Roughness Lengths for Momentum and Heat Derived from Outdoor Urban Scale Models, *Journal of Applied*  
3 *Meteorology & Climatology*, 46, 1067-1079, 2007.

4 Kueppers, L. M., Snyder, M. A., and Sloan, L. C.: Irrigation cooling effect: Regional climate forcing by land-use change,  
5 *Geophysical Research Letters*, 34, 407-423, 2007.

6 Lee, X., Goulden, M. L., Hollinger, D. Y., Barr, A., Black, T. A., Bohrer, G., Bracho, R., Drake, B., Goldstein, A., Gu, L., Katul, G.,  
7 Kolb, T., Law, B. E., Margolis, H., Meyers, T., Monson, R., Munger, W., Oren, R., Paw, U. K., Richardson, A. D., Schmid, H. P.,  
8 Staebler, R., Wofsy, S., and Zhao, L.: Observed increase in local cooling effect of deforestation at higher latitudes, *Nature*,  
9 479, 384-387, 10.1038/nature10588, 2011.

10 Li, H. Y., Fu, C. B., Guo, W. D., and Ma, F.: Study of energy partitioning and its feedback on the microclimate over different  
11 surfaces in an arid zone, *Acta Physica Sinica*, 64, 59201-059201, 2015.

12 Lin, S., Feng, J., Wang, J., and Hu, Y.: Modeling the contribution of long - term urbanization to temperature increase in three  
13 extensive urban agglomerations in China, *Journal of Geophysical Research Atmospheres*, 121, 1683-1697, 2016.

14 Lobell, D. B., Bala, G., and Duffy, P. B.: Biogeophysical impacts of cropland management changes on climate, *Geophysical*  
15 *Research Letters*, 33, 272-288, 2006.

16 Luyssaert, S., Jammot, M., Stoy, P. C., Estel, S., Pongratz, J., Ceschia, E., Churkina, G., Don, A., Erb, K., Ferlicoq, M., Gielen, B.,  
17 Grünwald, T., Houghton, R. A., Klumpp, K., Knohl, A., Kolb, T., Kuemmerle, T., Laurila, T., Lohila, A., Loustau, D., McGrath, M.  
18 J., Meyfroidt, P., Moors, E. J., Naudts, K., Novick, K., Otto, J., Pilegaard, K., Pio, C. A., Rambal, S., Rebmann, C., Ryder, J.,  
19 Suyker, A. E., Varlagin, A., Wattenbach, M., and Dolman, A. J.: Land management and land-cover change have impacts of  
20 similar magnitude on surface temperature, *Nature Climate Change*, 4, 389-393, 10.1038/nclimate2196, 2014.

21 McCarthy, M. P., Best, M. J., and Betts, R. A.: Climate Change in Cities Due to Global Warming and Urban Effects,  
22 *Geophysical Research Letters*, 37, 232-256, 2010.

23 Moore, C. J.: Frequency response corrections for eddy correlation systems, *Boundary-Layer Meteorology*, 37, 17-35, 1986.

24 Niu, G.-Y., Yang, Z.-L., Mitchell, K. E., Chen, F., Ek, M. B., Barlage, M., Kumar, A., Manning, K., Niyogi, D., Rosero, E., Tewari,  
25 M., and Xia, Y.: The community Noah land surface model with multiparameterization options (Noah-MP): 1. Model  
26 description and evaluation with local-scale measurements, *Journal of Geophysical Research*, 116, 10.1029/2010jd015139,  
27 2011.

28 Pitman, A. J., Noblet-Ducoudré, N. D., Cruz, F. T., Davin, E. L., Bonan, G. B., Brovkin, V., Claussen, M., Delire, C., Ganzeveld, L.,  
29 and Gayler, V.: Uncertainties in climate responses to past land cover change: First results from the LUCID intercomparison  
30 study, *Geophysical Research Letters*, 36, 171-183, 2009.

31 Verhoef, A., and De Bruin, H. A. R.: Some Practical Notes on the Parameter  $k_B -1$  for Sparse Vegetation, *Journal of Applied*  
32 *Meteorology*, 36, 560-572, 1997.

33 Wang, G., Huang, J., Guo, W., Zuo, J., Wang, J., Bi, J., Huang, Z., and Shi, J.: Observation analysis of land-atmosphere  
34 interactions over the Loess Plateau of northwest China, *Journal of Geophysical Research*, 115, 10.1029/2009jd013372,  
35 2010.

36 Webb, E. K., Pearman, G. I., and Leuning, R.: Correction of flux measurements for density effects due to heat and water  
37 vapour transfer, *Quarterly Journal of the Royal Meteorological Society*, 106, 85-100, 1980.

38 Wilczak, J. M., Oncley, S. P., and Stage, S. A.: Sonic Anemometer Tilt Correction Algorithms, *Boundary-Layer Meteorology*,  
39 99, 127-150, 2001.

40 Xue, Y., Juang, H. M. H., Li, W. P., Prince, S., Defries, R., Jiao, Y., and Vasic, R.: Role of land surface processes in monsoon  
41 development: East Asia and West Africa, *Journal of Geophysical Research Atmospheres*, 109, 215-229, 2004.

42 Yang, K., Ding, B., Qin, J., Tang, W., Lu, N., and Lin, C.: Can aerosol loading explain the solar dimming over the Tibetan  
43 Plateau?, *Geophysical Research Letters*, 39, 10.1029/2012GL053733, 2012.

44 Yang, K., Wu, H., Qin, J., Lin, C., Tang, W., and Chen, Y.: Recent climate changes over the Tibetan Plateau and their impacts  
45 on energy and water cycle: A review, *Global and Planetary Change*, 112, 79-91, 10.1016/j.gloplacha.2013.12.001, 2014.

46 Zeng, X., and Dickinson, R. E.: Effect of Surface Sublayer on Surface Skin Temperature and Fluxes, *Journal of Climate*, 11,  
47 537-550, 1998.

1 Zhang, X., Xiong, Z., Zhang, X., Shi, Y., Liu, J., Shao, Q., and Yan, X.: Using multi-model ensembles to improve the simulated  
2 effects of land use/cover change on temperature: a case study over northeast China, *Climate Dynamics*, 46, 765-778,  
3 10.1007/s00382-015-2611-4, 2015.

4 Zhang, Y., Liu, H., Foken, T., Williams, Q. L., Mauder, M., and Thomas, C.: Coherent structures and flux contribution over an  
5 inhomogeneously irrigated cotton field, *Theoretical and Applied Climatology*, 103, 119-131, 2011.

6 Zhao, L., Lee, X., Smith, R. B., and Oleson, K.: Strong contributions of local background climate to urban heat islands, *Nature*,  
7 511, 216-219, 10.1038/nature13462, 2014.

8  
9  
10  
11  
12  
13  
14  
15  
16  
17  
18  
19  
20  
21  
22  
23  
24  
25  
26  
27  
28  
29

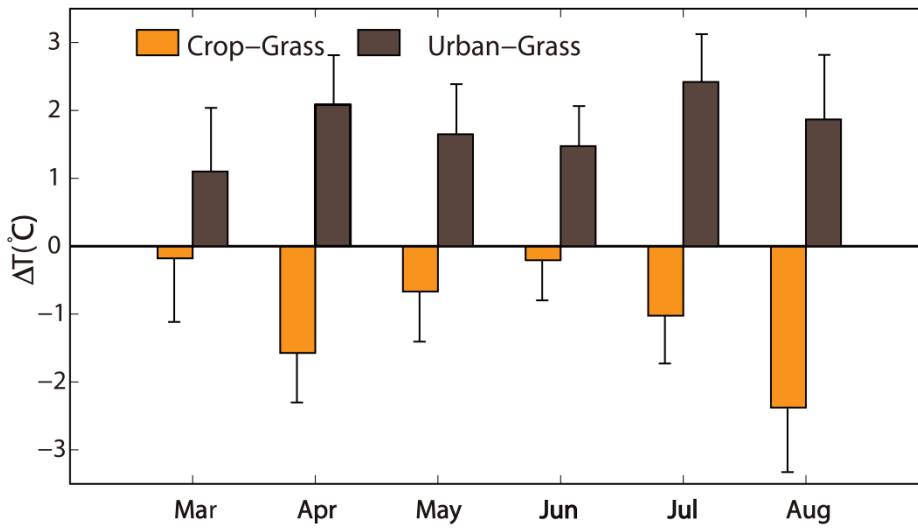

1  
 2 **Figure 1: Differences in surface temperature between different sites in Nanjing from March to**  
 3 **August 2013. Error bars, 1s.d. for each month.**

4  
 5  
 6  
 7  
 8  
 9  
 10  
 11  
 12  
 13

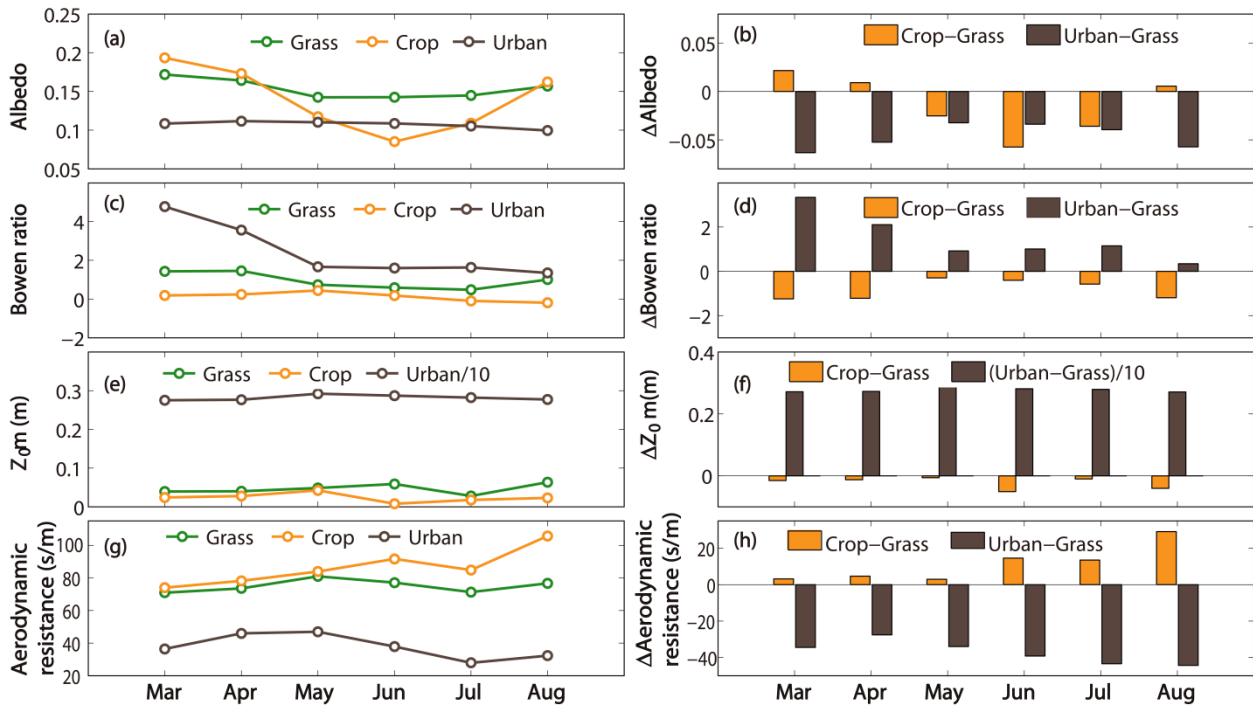

1  
2  
3  
4  
5  
6

**Figure 2: Monthly variations of different factors at the three sites and the differences between the other two sites and the grass site in Nanjing from March to August 2013: (a,b) albedo, (c,d) Bowen ratio, (e,f) surface roughness, and (g,h) aerodynamic resistance.**



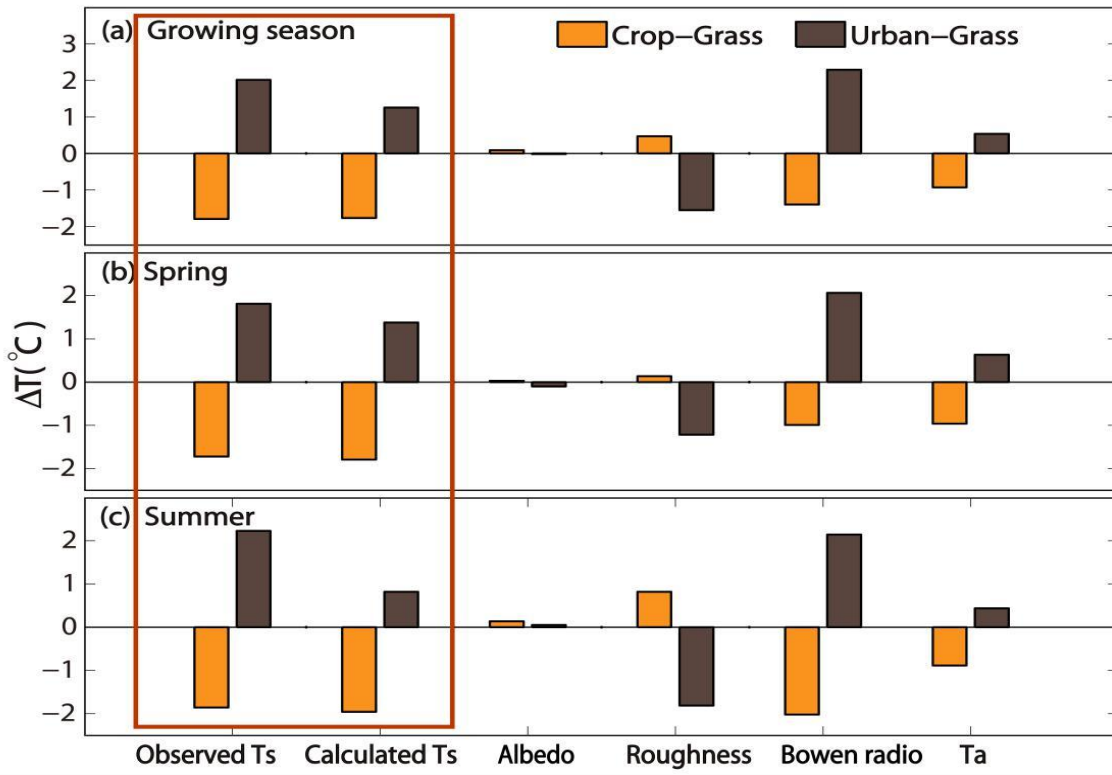

1

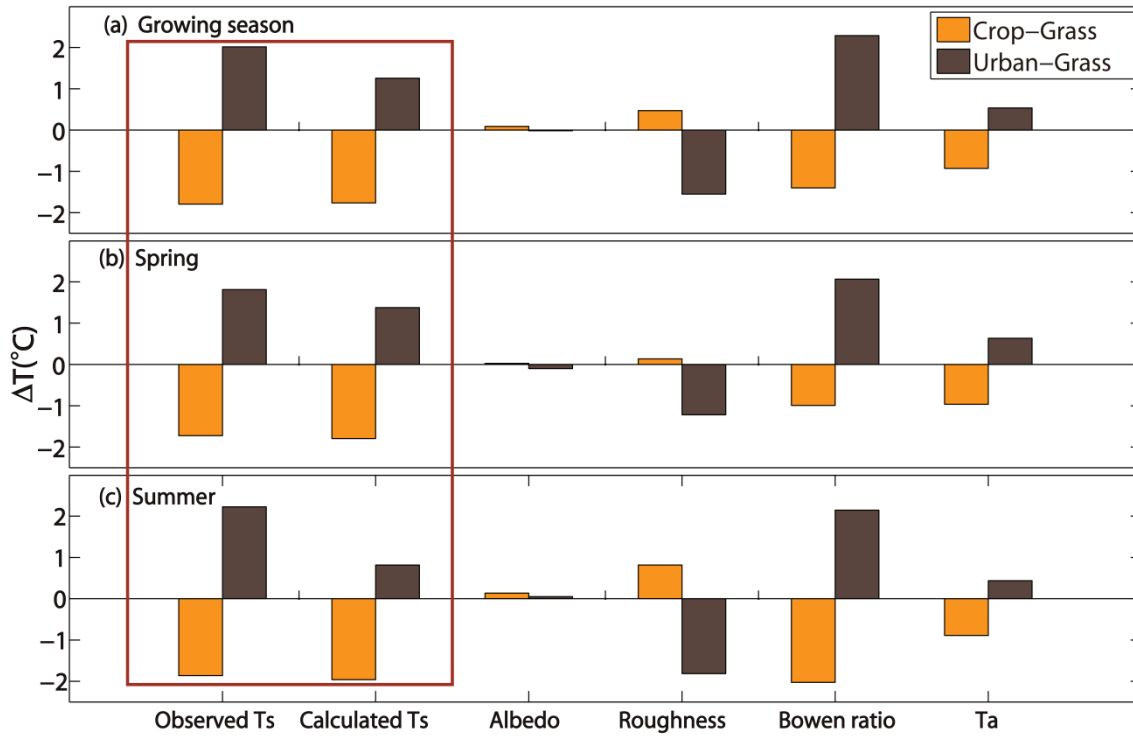

2

1 **Figure 3: Contributions to the differences in surface temperature between urban and cropland**  
2 **sites and the grassland site due to radiation, aerodynamic resistance, evaporation, and air**  
3 **temperature ( $T_a$ ) in (a) growing season, (b) spring and (c) summer, 2013.**

4
